# **Viral coinfection is shaped by host ecology and virus-virus interactions across diverse microbial taxa and environments**

Running head: Drivers of viral coinfection

Samuel L. Díaz Muñoz#

Center for Genomics and Systems Biology + Department of Biology

12 Waverly Place

New York University, New York, NY, USA 10003

#Address correspondence to: Samuel L. Díaz Muñoz, [sam.diazmunoz@nyu.edu](mailto:sam.diazmunoz@nyu.edu)

## **Abstract**

Infection of more than one virus in a host, coinfection, is common across taxa and environments.

Viral coinfection can enable genetic exchange, alter the dynamics of infections, and change the course of viral evolution. Yet, a systematic test of the factors explaining variation in viral coinfection across different taxa and environments awaits completion. Here I employ three microbial data sets of virus-host interactions covering cross-infectivity, culture coinfection, and single-cell coinfection (total: 6,564 microbial hosts, 13,103 viruses) to provide a broad, comprehensive picture of the ecological and biological factors shaping viral coinfection. I found evidence that ecology and virus-virus interactions are recurrent factors shaping coinfection patterns. Host ecology was a consistent and strong predictor of coinfection across all three datasets: cross-infectivity, culture coinfection, and single-cell coinfection. Host phylogeny or taxonomy was a less consistent predictor, being weak or absent in the cross-infectivity and single-cell coinfection models, yet it was the strongest predictor in the culture coinfection model. Virus-virus interactions strongly affected coinfection. In the largest test of superinfection exclusion to date, prophage sequences reduced culture coinfection by other prophages, with a weaker effect on extrachromosomal virus coinfection. At the single-cell level, prophage sequences eliminated coinfection. Virus-virus interactions also *increased* culture coinfection

30 with ssDNA-dsDNA coinfections >2x more likely than ssDNA-only coinfections. The presence  
31 of CRISPR spacers was associated with a ~50% reduction in single-cell coinfection in a marine  
32 bacteria, despite the absence of exact spacer matches in any active infection. Collectively, these  
33 results suggest the environment bacteria inhabit and the interactions among surrounding viruses  
34 are two factors consistently shaping viral coinfection patterns. These findings highlight the role  
35 of virus-virus interactions in coinfection with implications for phage therapy, microbiome  
36 dynamics, and viral infection treatments.

## 37 **Introduction**

38 Viruses outnumber hosts by a significant margin (Bertani, 1954; Bergh *et al.*, 1989; Suttle, 2007;  
39 Weinbauer, 2004; Rohwer and Barott, 2012; Wigington *et al.*, 2016). In this situation, infection  
40 of more than one strain or type of virus in a host (coinfection) might be expected to be a rather  
41 frequent occurrence potentially leading to virus-virus interactions (Berngruber *et al.*, 2010; Díaz-  
42 Muñoz and Koskella, 2014; Bergh *et al.*, 1989; Rohwer and Barott, 2012; Suttle, 2007;  
43 Weinbauer, 2004). Across many different viral groups, virus-virus interactions within a host can  
44 alter genetic exchange (Dang *et al.*, 2004; Worobey and Holmes, 1999; Cicin-Sain *et al.*, 2005;  
45 Turner *et al.*, 1999), modify viral evolution (Joseph *et al.*, 2009; Refardt, 2011; Roux *et al.*,  
46 2015; Dropulić *et al.*, 1996; Ghedin *et al.*, 2005; Turner and Chao, 1998), and change the fate of  
47 the host (Roux *et al.*, 2012; Vignuzzi *et al.*, 2006; Li *et al.*, 2010; Abrahams *et al.*, 2009). Yet,  
48 there is little information regarding the ecological and biological factors that shape coinfection  
49 and virus-virus interactions. Given that most laboratory studies of viruses focus on a single virus  
50 at a time (DaPalma *et al.*, 2010), understanding the drivers of coinfection and virus-virus  
51 interactions is a pressing frontier for viral ecology.

52

53 Recent studies of bacteriophages have highlighted just how widespread coinfection is and have  
54 started to shed light on the ecology of viral coinfection. For example, although studies of phage  
55 host range have shown that some bacterial hosts can be infected by more than one type of phage  
56 for some time (Moebus and Nattkemper, 1981; Kaiser and Dworkin, 1975; Spencer, 1957),  
57 mounting evidence indicates this is a pervasive phenomenon (Koskella and Meaden, 2013;  
58 Flores *et al.*, 2013; 2011). The ability of two or more viruses to independently infect the same  
59 host –cross-infectivity– revealed in these studies of host range is a necessary, but not sufficient  
60 criterion to determine coinfection. Thus, cross-infectivity or the potential for coinfection,  
61 represents a baseline shaping coinfection patterns. To confirm coinfection, sequence-based  
62 approaches have been used to detect viral coinfection at two scales: >1 virus infecting the same  
63 multicellular host (e.g., a multicellular eukaryote or a colony of bacterial cells, hereafter called  
64 culture coinfection), or to the coinfection of a single cell. At the culture coinfection scale, a study  
65 mining sequence data to examine virus-host relationships uncovered widespread coinfection in  
66 publicly available bacterial and archaeal genome sequence data (Roux *et al.*, 2015). At the  
67 single-cell scale, two studies have provided, for the first time, single-cell level information on  
68 viruses associated with specific hosts isolated from the environment in a culture-independent  
69 manner (Roux *et al.*, 2014; Labonté *et al.*, 2015). Collectively, these studies suggest that there is  
70 a large potential for coinfection and that this potential is realized at both the host culture and  
71 single cell scales. A summary of these studies suggests roughly half of hosts have the potential to  
72 be infected (i.e. are cross-infective) or are actually infected by an average of >2 viruses (Table  
73 1). Thus, there is extensive evidence across various methodologies, taxa, environments, that  
74 coinfection is widespread and virus-virus interactions may be a frequent occurrence.

75

76

77 **Table 1.** *Viral coinfection is prevalent across various methodologies, taxa, environments, and scales of coinfection.*

|                                         | Cross-infectivity<br>(potential coinfection)                           | Culture<br>coinfection               | Single-cell<br>coinfection  |
|-----------------------------------------|------------------------------------------------------------------------|--------------------------------------|-----------------------------|
| Number of viruses                       | 4.89 ( $\pm$ 4.61)                                                     | 3.377 $\pm$ 1.804                    | 2.37 $\pm$ 0.83             |
| Prop of bacteria w/ multiple infections | 0.654                                                                  | 0.538                                | 0.450                       |
| Reference                               | (GOLD: Mukherjee <i>et al.</i> ,<br>2017; Flores <i>et al.</i> , 2011) | (Roux <i>et al.</i> , 2014;<br>2015) | (Roux <i>et al.</i> , 2014) |

78

79 The aforementioned studies, among others, establish that viral coinfection is a frequent  
80 occurrence in bacterial and archaeal hosts, but systematic tests of the factors explaining variation  
81 in viral coinfection across different taxa and environments are lacking. However, the literature  
82 suggests four factors that are likely to play a role: host ecology, host taxonomy or phylogeny,  
83 host defense mechanisms, and virus-virus interactions. The relevance and importance of these  
84 are likely to vary for cross-infectivity, culture coinfection, and single-cell coinfection.

85

86 Cross-infectivity has been examined in studies of phage host-range, which have provided some  
87 insight into the factors affecting potential coinfection. In a single bacterial species there can be  
88 wide variation in phage host range (Holmfeldt *et al.*, 2007), and thus, cross-infectivity. A larger,  
89 quantitative study of phage-bacteria infection networks in multiple taxa also found wide  
90 variation in cross-infectivity in narrow taxonomic ranges (strain or species level), with some  
91 hosts susceptible to few viruses and others to many (R Development Core Team, 2011).

92 However, at broader host taxonomic scales, cross-infectivity followed a modular pattern,  
93 suggesting that higher taxonomic ranks could influence cross-infectivity (Flores *et al.*, 2013).

94 Thus, host taxonomy may show a scale dependent effect in shaping coinfection patterns. Flores  
95 *et al.* (2013) also highlighted the potential role of ecology in shaping coinfection patterns as  
96 geographic separation played a role in cross-infectivity. Thus, bacterial ecology and phylogeny

97 (particularly at taxonomic ranks above species) are the primary candidates for drivers of  
98 coinfection.

99  
100 Culture and single cell coinfection, require cross-infectivity, but also require both the bacteria  
101 and infecting viruses to allow simultaneous or sequential infection. Thus, in addition to bacterial  
102 phylogeny and ecology, we can expect additional factors shaping coinfection, namely bacterial  
103 defense mechanisms and virus-virus interactions. An extensive collection of studies provides  
104 evidence that bacterial and viral mechanisms may affect coinfection. Bacteria, understandably  
105 reluctant to welcome viruses, possess a collection of mechanisms of defense against viral  
106 infection (Labrie *et al.*, 2010), including restriction enzymes (Murray, 2002; Linn and Arber,  
107 1968) and CRISPR-Cas systems (Horvath and Barrangou, 2010). The latter have been shown to  
108 be an adaptive immune system for bacteria, protecting from future infection by the same phage  
109 (Barrangou *et al.*, 2007) and preserving the memory of viral infections past (Held and Whitaker,  
110 2009). Metagenomic studies of CRISPR in natural environments suggest rapid coevolution of  
111 CRISPR arrays (Tyson and Banfield, 2008), but little is known regarding the *in-situ* protective  
112 effects of CRISPR on cells, which should now be possible to decipher with single-cell genomics.

113  
114 Viruses also have mechanisms to mediate infection by other viruses, some of which were  
115 identified in early lab studies of bacteriophages (Ellis and Delbruck, 1939; Delbruck, 1946). An  
116 example of a well-described phenomenon of virus-virus interactions is superinfection immunity  
117 conferred by lysogenic viruses (Bertani, 1953), which can inhibit coinfection of cultures and  
118 single cells (Bertani, 1954). While this mechanism has been described in several species, its  
119 frequency at broader taxonomic scales and its occurrence in natural settings is not well known.

120 Most attention in virus-virus interactions has focused on mechanisms limiting coinfection, with  
121 the assumption that coinfection invariably reduces host fitness (Berngruber *et al.*, 2010).  
122 However, some patterns of non-random coinfection suggest elevated coinfection (Dang *et al.*,  
123 2004; Cicin-Sain *et al.*, 2005; Turner *et al.*, 1999) and specific viral mechanisms that promote  
124 co-infection have been identified, including enhanced expression of the phage attachment site  
125 upon infection (Joseph *et al.*, 2009), particle aggregation (Altan-Bonnet and Chen, 2015;  
126 Aguilera *et al.*, 2017), and phage-phage communication (Erez *et al.*, 2017). Systematic  
127 coinfection has been proposed (Roux *et al.*, 2012) to explain findings of chimeric viruses of  
128 mixed nucleic acids in metagenome reads (Diemer and Stedman, 2012; Roux *et al.*, 2013). This  
129 suspicion was confirmed in a study of marine bacteria that found highly non-random patterns of  
130 coinfection between ssDNA and dsDNA viruses in a lineage of marine bacteria (Roux *et al.*,  
131 2014), but the frequency of this phenomenon across bacterial taxa remains to be uncovered.  
132 Thus, detailed molecular studies of coinfection dynamics and virome sequence data are  
133 generating questions ripe for testing across diverse taxa and environments.

134

135 Here I employ virus-host interaction data sets to date to provide a broad, comprehensive picture  
136 of the ecological and biological factors shaping coinfection. The data sets are each the largest of  
137 their kind, providing an opportunity to examine viral coinfection at multiple scales, from cross-  
138 infectivity (1,005 hosts; 499 viruses), to culture coinfection (5,492 hosts; 12,498 viruses) and  
139 single-cell coinfection (127 hosts; 143 viruses) to answer the following questions:

- 140 1) How do ecology, bacterial phylogeny/taxonomy, bacterial defense mechanisms, and  
141 virus-virus interactions explain variation in estimates of viral coinfection?

- 142 2) What is the relative importance of each of these factors in cross-infectivity, culture  
143 coinfection, and single-cell coinfection?
- 144 3) Do prophage sequences limit viral coinfection?
- 145 4) Do ssDNA and dsDNA viruses show evidence of preferential coinfection?
- 146 5) Do sequences associated with the CRISPR-Cas bacterial defense mechanism limit  
147 coinfection of single cells?

148

149 The results of this study suggest that microbial host ecology and virus-virus interactions are  
150 consistently important mediators of the frequency and extent of coinfection. Host taxonomy and  
151 CRISPR spacers also shaped culture and single-cell coinfection patterns, respectively. Virus-  
152 virus interactions served to limit and promote coinfection.

## 153 **Materials and Methods**

### 154 *Data Sets*

155 I assembled data collectively representing 13,103 viral infections in 6,564 bacterial and archaeal  
156 hosts from diverse environments (Table S1). These data are composed of three data sets that  
157 provide an increasingly fine-grained examination of coinfection from cross-infectivity (potential  
158 coinfection), to coinfection at the culture (pure cultures or single colonies, not necessarily single  
159 cells) and single-cell levels. The data set examining cross-infectivity assessed infection  
160 experimentally with laboratory cultures, while other two data sets (culture and single-cell  
161 coinfection) used sequence data to infer infection.

162

163 The first data set on cross-infectivity (potential coinfection) is composed of bacteriophage host-  
164 range infection matrices documenting the results of experimental attempts at lytic infection in

165 cultured phage and hosts (Flores *et al.*, 2011). It compiles results from 38 published studies,  
166 encompassing 499 phages and 1,005 bacterial hosts. Additionally, I entered new metadata  
167 (ecosystem and ecosystem category) to match the culture coinfection data set (see description  
168 below), to enable comparisons between these two multi-taxon data sets. The host-range infection  
169 data are matrices of infection success or failure via the “spot test”, briefly, a drop of phage lysate  
170 is “spotted” on a bacterial lawn and lysing of bacteria is noted as presence or absence. This data  
171 set represents studies with varying sample compositions, in terms of bacteria and phage species,  
172 bacterial energy sources, source of samples, bacterial association, and isolation habitat.

173  
174 The second data set on culture coinfection is derived from viral sequence information mined  
175 from published microbial genome sequence data on National Center for Biotechnology  
176 Information’s (NCBI) databases (Roux *et al.*, 2015). Thus, this second data set provided  
177 information on actual (as opposed to potential) coinfection of cultures, representing 12,498 viral  
178 infections in 5,492 bacterial and archaeal hosts. The set includes data on viruses that are  
179 incorporated into the host genome (prophages) as well as extrachromosomal viruses detected in  
180 the genome assemblies (representing lytic, chronic, carrier state, and ‘extrachromosomal  
181 prophage’ infections). Genomes of microbial strains were primarily generated from colonies or  
182 pure cultures (except for 27 hosts known to be represented by single cells). Thus, although these  
183 data could represent coinfection at the single-cell level, they are more conservatively regarded as  
184 culture coinfections. In addition, I imported metadata from the US Department of Energy, Joint  
185 Genome Institute, Genomes Online Database (GOLD: Mukherjee *et al.*, 2017) to assess the  
186 ecological and host factors (ecosystem, ecosystem category, and energy source) that could  
187 influence culture coinfection. I curated these records and added missing metadata (n = 4964



188 records) by consulting strain databases (e.g. NCBI BioSample, DSMZ, BEI Resources, PATRIC  
189 and ATCC) and the primary literature.

190

191 The third data set included single-cell amplified genomes, providing information on coinfection  
192 and virus-virus interactions within single cells (Roux *et al.*, 2014). This genomic data set covers  
193 viral infections in 127 single cells of SUP05 marine bacteria (sulfur-oxidizing  
194 Gammaproteobacteria) isolated from different depths of the oxygen minimum zone in the  
195 Saanich Inlet near Vancouver Island, British Columbia (Roux *et al.*, 2014). These single-cell  
196 data represent a combined 143 viral infections including past infections (CRISPRs and  
197 prophages) and active infections (active at the time of isolation, e.g. ongoing lytic infections).

198

199 A list and description of data sources are included in Supplementary Table 1, and the raw data  
200 used in this paper are deposited in the FigShare data repository (FigShare  
201 doi:[10.6084/m9.figshare.2072929](https://doi.org/10.6084/m9.figshare.2072929)).

### 202 ***Factors explaining cross-infectivity and coinfection***

203 To test the factors that potentially influence coinfection –ecology, host taxonomy/phylogeny,  
204 host defense mechanisms, and virus-virus interactions– I conducted regression analyses on each  
205 of the three data sets, representing an increasingly fine scale analysis of coinfection from cross-  
206 infectivity, to culture coinfection, and finally to single-cell coinfection. The data sets represent  
207 three distinct phenomena related to coinfection and thus the variables and data in each one are  
208 necessarily different. The measures of coinfection, for example, were 1) the amount of phage  
209 that could infect each host, 2) the number of extrachromosomal infections, and 3) the number of  
210 active viral infections, respectively, for cross-infectivity, culture coinfection, and single-cell  
211 coinfection data sets. Virus-virus interactions were measured as the association of these

212 aforementioned ongoing viral infections with the presence of other types of viruses (e.g.  
213 prophages) or the association of viruses with different characteristics (e.g. ssDNA vs dsDNA).  
214 Ecological factors and bacterial taxonomy were tested in all data sets, but virus-virus  
215 interactions, for example, were not evaluated in the cross-infectivity data set because they do not  
216 apply (i.e., measures potential and not actual coinfection). Table 2 details the data used to test  
217 each of the factors that potentially influence coinfection and details on the analysis of each data  
218 set are provided in turn below.

219 **Table 2.** *Factors explaining coinfection tested with each of the three data sets and (specific variable tested).*

|                          | Cross-infectivity<br>(potential coinfection) | Culture-level<br>coinfection | Single-cell<br>coinfection |
|--------------------------|----------------------------------------------|------------------------------|----------------------------|
| Ecology                  | Yes (habitat, association)                   | Yes (habitat)                | Yes (depth)                |
| Taxonomic Group          | Yes (rank)                                   | Yes (rank)                   | Yes (rRNA cluster)         |
| Host Defense Sequences   | No                                           | No                           | Yes (CRISPR)               |
| Virus-virus interactions | N/A                                          | Yes (prophage, ssDNA)        | Yes (prophage)             |

220  
221 First, to test the potential influence of these factors on cross-infectivity, I conducted a factorial  
222 analysis of variance (ANOVA) on the cross-infectivity data set. The dependent variable was the  
223 amount of phage that could infect each host, measured specifically as the proportion of tested  
224 phage that could infect each host because the infection matrices in this data set were derived  
225 from different studies testing varying numbers of phages. Thus, as the number of phage that  
226 could infect each host (cross-infectivity) increased, the potential for coinfection was greater. The  
227 five independent variables tested were the study type/source (natural, coevolution, artificial),  
228 bacterial taxon (roughly corresponding to Genus), habitat from which bacteria and phages were  
229 isolated, bacterial energy source (photosynthetic or heterotrophic), and bacterial association (e.g.  
230 pathogen, free-living). Geographic origin and phage taxa were present in original the metadata,  
231 but were largely incomplete; therefore they were not included in the analyses. Model criticism  
232 suggested that ANOVA assumptions were reasonably met (Supplementary Figure 1), despite

233 using proportion data (Warton and Hui, 2011). ANOVA on the arc-sine transform of the  
234 proportions and a binomial regression provided qualitatively similar results (data not shown, see  
235 associated code in FigShare repository).

236  
237 Second, to test the factors influencing culture coinfection I conducted a negative binomial  
238 regression on the culture coinfection data set. The number of extrachromosomal viruses infecting  
239 each host culture, as detected by sequence data, was the dependent variable. These viruses  
240 represent ongoing infections (e.g. lytic, chronic, or carrier state), as opposed to viral sequences  
241 integrated into the genome that may or may not be active. Thus, as more extrachromosomal  
242 infections are detected in a host culture, culture coinfection increases. The five explanatory  
243 variables tested were the number of prophage sequences, ssDNA virus presence, energy source  
244 (e.g. heterotrophic/autotrophic), taxonomic rank (Genus was selected as the best predictor over  
245 Phylum or Family, details in code in Figshare repository), and habitat (environmental, host-  
246 associated, or engineered; as defined by GOLD specifications (Mukherjee *et al.*, 2017)). I  
247 conducted stepwise model selection using Akaike's Information Criterion (AIC), a routinely  
248 used measure of entropy that ranks the relative quality of alternative models (Akaike, 1974), to  
249 arrive at a reduced model that minimized the deviance of the regression.

250  
251 Third, to test the factors influencing single cell coinfection I conducted a Poisson regression on  
252 single cell data set. The number of actively infecting viruses in each cell, as detected by sequence  
253 data, was the dependent variable. This variable excludes viral sequences integrated into the  
254 genome (e.g. prophages) that may or may not be active. Thus, as the number of active viral  
255 infections detected increase, single cell coinfection is greater. The four the explanatory variables

256 tested were phylogenetic cluster (based on small subunit rRNA amplicon sequencing), ocean  
257 depth, number of prophage sequences, and number of CRISPR spacers. I conducted stepwise  
258 model selection with AIC (as done with the culture coinfection data set, see above) to arrive at a  
259 reduced model that minimized deviance.

### 260 *Virus-virus interactions (prophages and ss/dsDNA) in culture and single cell* 261 *coinfection*

262 To obtain more detailed information (beyond the regression analyses) on the influence of virus-  
263 virus interactions on the frequency and extent of coinfection, I analyzed the effect of prophage  
264 sequences in culture and single-cell coinfections, and the influence of ssDNA and dsDNA  
265 viruses on culture coinfection.

266

267 The examinations of prophage infections were entirely sequence-based in the culture coinfection  
268 and single-cell coinfection data sets. Because only sequence data is used, the activity of these  
269 prophage sequences cannot be confirmed. For instance, the prophage sequences in the original  
270 single-cell data set were conservatively termed ‘putative defective prophages’ (Roux *et al.*,  
271 2014), because sequences were too small to be confidently assigned as complete prophage  
272 sequences (S. Roux, pers. comm.). Therefore, I will hereafter be primarily using the phrase  
273 ‘prophage sequences’ (especially when indicating results) synonymously with ‘prophages’,  
274 primarily for grammatical convenience. To determine whether prophage sequences affected the  
275 frequency and extent of coinfection in the culture coinfection data set, I examined host cultures  
276 infected exclusively by prophage sequences or extrachromosomal viruses (representing chronic,  
277 carrier state, and ‘extrachromosomal prophage’ infections) and all prophage-infected cultures. I  
278 tested whether prophage-only coinfections were infected by a different average number of  
279 viruses compared to extrachromosomal-only coinfections using a Wilcoxon Rank Sum test. I

280 tested whether prophage-infected cultures were more likely than not to be coinfections, and  
281 whether these coinfections were more likely to occur with additional prophage sequences or  
282 extrachromosomal viruses.

283  
284 To examine the effect of prophage sequences on coinfection frequency in the single-cell data set,  
285 I examined cells with prophage sequences and calculated the proportion of those that also had  
286 active infections. To determine the extent of coinfection in cells with prophage sequences, I  
287 calculated the average number of active viruses infecting these cells. I examined differences in  
288 the frequency of active infection between bacteria with or without prophage sequences using a  
289 proportion test and differences in the average amount of current viral infections using a  
290 Wilcoxon rank sum test.

291  
292 To examine whether ssDNA and dsDNA viruses exhibited non-random patterns of culture  
293 coinfection, as found by Roux et al. (2014) for single cells of SUP05 marine bacteria, I examined  
294 the larger culture coinfection data set (based on Roux *et al.*, 2015) that is composed of sequence-  
295 based viral detections in all bacterial and archaeal NCBI genome sequences. I first compared the  
296 frequency of dsDNA-ssDNA mixed coinfections against ssDNA-only coinfections among all  
297 host cultures coinfecting with at least one ssDNA virus (n=331), using a binomial test. To provide  
298 context for this finding (because ssDNA viruses were a minority of detected viral infections) I  
299 also examined the prevalence of dsDNA-only and dsDNA-mixed coinfections and compared the  
300 proportion of ssDNA-mixed/total-ssDNA coinfections with the proportion of  
301 dsDNA-mixed/dsDNA-total coinfections using a proportion test. To examine whether potential  
302 biases in the detectability of ssDNA viruses relative to dsDNA viruses (Roux *et al.*, 2016) could

303 affect ssDNA-dsDNA coinfection detection, I also tested the percent detectability of ssDNA  
304 viruses in the overall data set, compared to the percentage of coinfecting host cultures that  
305 contained at least one ssDNA virus using a proportion test. Finally, because the extended  
306 persistent infections maintained by some ssDNA viruses (particularly in the *Inoviridae* family)  
307 have been proposed to underlie previous patterns of enhanced coinfection between dsDNA and  
308 ssDNA viruses, I examined the proportion of coinfections involving ssDNA viruses that had at  
309 least one virus of the *Inoviridae* among ssDNA-only coinfections, ssDNA single infections, and  
310 ssDNA-dsDNA coinfections.

### 311 *Effect of CRISPR spacers on single cell coinfection*

312 In order to obtain a more detailed picture of the potential role of bacterial defense mechanisms in  
313 coinfection, I investigated the effect of CRISPR spacers (sequences retained from past viral  
314 infections by the CRISPR-Cas defense mechanisms) on the frequency of cells undergoing active  
315 infections in the single cell data set (n=127 cells of SUP05 bacteria). I examined cells that  
316 harbored CRISPR spacers in the genome and calculated the proportion of those that also had  
317 active infections. To determine the extent of coinfection in cells with CRISPR spacers, I  
318 calculated the average number of active viruses infecting these cells. I examined differences in  
319 the frequency of cells undergoing active infections in cells with or without CRISPR spacers  
320 using a proportion test. I examined differences in the average number of current viral infections  
321 in cells with or without CRISPR spacers using a Wilcoxon rank sum test.

### 322 *Statistical Analyses*

323 I conducted all statistical analyses in the R statistical programming environment (R Development  
324 Core Team, 2011) and generated graphs using the ggplot2 package (Wickham, 2009). Means are  
325 presented as means  $\pm$  standard deviation, unless otherwise stated. Data and code for analyses and

326 figures are available in the Figshare data repository (FigShare  
327 doi:[10.6084/m9.figshare.2072929](https://doi.org/10.6084/m9.figshare.2072929)).

## 328 **Results**

### 329 *Host ecology and virus-virus interactions consistently explain variation in* 330 *potential (cross-infectivity), culture, and single-cell coinfection*

331 To test the factors that influence viral coinfection of microbes, I conducted regression analyses  
332 on each of the three data sets (cross-infectivity, culture coinfection, and single cell coinfection).

333 The explanatory variables tested in each data set varied slightly (Table 2), but can be grouped  
334 into host ecology, virus-virus interactions, host taxonomic or phylogenetic group, and sequences  
335 associated with host defense. Overall, host ecology and virus-virus interactions (association of  
336 ongoing infections with other viruses, e.g. prophages or ssDNA viruses) appeared as statistically  
337 significant factors that explained a substantial amount of variation in coinfection in every data set  
338 they were tested (see details for each data set in subheadings below). Host taxonomy was a less  
339 consistent predictor across the data sets. The taxonomic group of the host explained little  
340 variation or was not a statistically significant predictor of cross-infectivity and single-cell  
341 coinfection, respectively. However, host taxonomy was the strongest predictor of the amount of  
342 culture coinfection, judging by the amount of deviance explained in the negative binomial  
343 regression. Sequences associated with host defense mechanisms, specifically CRISPR spacers,  
344 were tested only in the single cell data set (n = 127 cells of SUP05 marine bacteria) and were a  
345 statistically significant and strong predictor of coinfection.

### 346 *Potential for coinfection (cross-infectivity) is shaped by bacterial ecology and* 347 *taxonomy*

348 To test the viral and host factors that affected cross-infectivity, I conducted an analysis of  
349 variance on the cross-infectivity data set, a compilation of 38 phage host-range studies that  
350 measured the ability of different phages (n=499) to infect different bacterial hosts (n=1,005)

351 using experimental infections of cultured microbes in the laboratory (Flores *et al.*, 2011). In this  
352 data set cross-infectivity is the proportion of tested phage that could infect each host. Stepwise  
353 model selection with AIC, yielded a reduced model that explained 33.89% of the variance in  
354 cross-infectivity using three factors: host association (e.g. free-living, pathogen), isolation habitat  
355 (e.g. soil, animal), and taxonomic grouping (Figure 1). The two ecological factors together  
356 explained >30% of the variance in cross-infectivity, while taxonomy explained only ~3% (Figure  
357 1D). Host association explained 8.41% of the variance in cross-infectivity. Bacteria that were  
358 pathogenic to cows had the highest potential coinfection with more than 75% of tested phage  
359 infecting each bacterial strain (Figure 1B). In absolute terms, the average host that was a  
360 pathogenic to cows could be infected 15 phages on average. The isolation habitat explained  
361 24.36% of the variation in cross-infectivity with clinical isolates having the highest median  
362 cross-infectivity, followed by sewage/dairy products, soil, sewage, and laboratory chemostats.  
363 All these habitats had more than 75% of tested phage infecting each host on average (Figure 1A)  
364 and, in absolute terms, the average host in each of these habitats could be infected by 3-15  
365 different phages.

366  
367 Bacterial energy source (heterotrophic, autotrophic) and the type of study (natural, coevolution,  
368 artificial) were not selected by AIC in final model. An alternative categorization of habitat that  
369 matched the culture coinfection data set (ecosystem: host-associated, engineered, environmental)  
370 was not a statistically significant predictor and was dropped from the model. Results from this  
371 alternative categorization (Figure S1 and Table S2) show that bacteria-phage groups isolated  
372 from host-associated ecosystems (e.g. plants, humans) had the highest cross-infectivity, followed  
373 by engineered ecosystems (18% lower), and environmental ecosystems (44% lower). Details of



374 the full, reduced, and alternative models are provided in Figure S2 and associated code in the  
 375 FigShare repository.

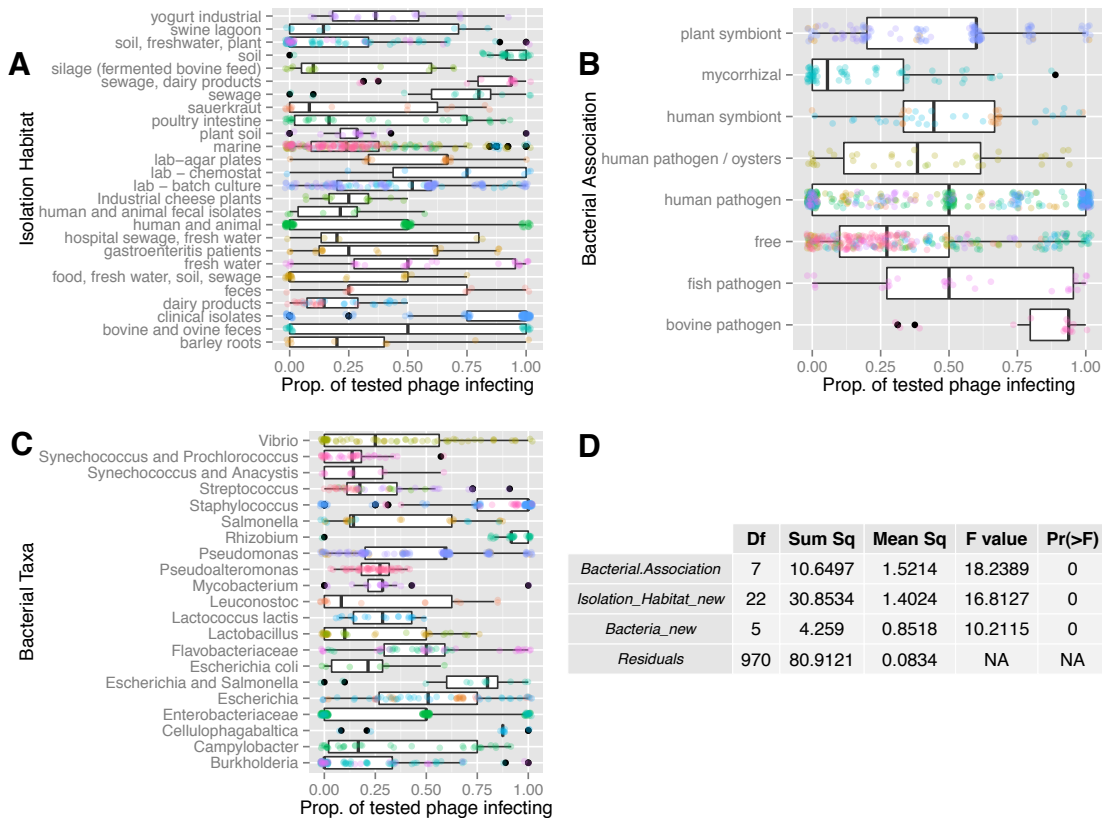

376  
 377 **Figure 1. Bacterial-phage ecology and taxonomy explain most of the variation in cross-infectivity.** The data set  
 378 is a compilation of 38 phage host range studies that measured the ability of different phages (n=499) to infect  
 379 different bacterial hosts (n=1,005) using experimental infections of cultured microbes in the laboratory (i.e., the  
 380 “spot test”). Cross-infectivity, or potential coinfection, is the number of phages that can infect a given bacterial host,  
 381 here measured as the proportion of tested phages infecting each host (represented by points). Cross-infectivity was  
 382 the response variable in an analysis of variance (ANOVA) that examined the effect of five factors (study type,  
 383 bacterial taxon, habitat from which bacteria and phages were isolated, bacterial energy source, and bacterial  
 384 association) on variation in the response variable. Those factors selected after stepwise model selection using  
 385 Akaike’s Information Criterion (AIC) are depicted in panels A-C. In these panels, each point represents a bacterial  
 386 host; hosts with a value of zero on the x-axis could be infected by none of the tested phage, whereas those with a  
 387 value of one could be infected by all the tested phages. Thus, the x-axis is a scale of the potential for coinfection.  
 388 Point colors correspond to hosts that were tested in the same study. Note data points are offset by a random and  
 389 small amount (jittered) to enhance visibility and reduce overplotting. The ANOVA table is presented in panel D.

390 ***Culture coinfection is influenced by host ecology and taxonomy and virus-virus***  
391 ***interactions***

392 To test the viral and host factors that affected culture coinfection, I conducted a negative  
393 binomial regression on the culture coinfection data set, which documented 12,498 viral  
394 infections in 5,492 microbial hosts using NCBI-deposited sequenced genomes (Roux *et al.*,  
395 2015) supplemented with metadata collected from the GOLD database (Mukherjee *et al.*, 2017).  
396 Culture coinfection was measured as the number of extrachromosomal virus sequences  
397 (representing lytic, chronic, or carrier state infections) detected in each host culture. Stepwise  
398 model selection with AIC resulted in a reduced model that used three factors to explain the  
399 number of extrachromosomal infections: host taxonomy (Genus), number of prophages and, host  
400 ecosystem. The genera with the most coinfection (mean >2.5 extrachromosomal infections) were  
401 *Avibacterium*, *Shigella*, *Selenomonas*, *Faecalibacterium*, *Myxococcus*, and *Oenococcus*, whereas  
402 *Enterococcus*, *Serratia*, *Helicobacter*, *Pantoea*, *Enterobacter*, *Pectobacterium*, *Shewanella*,  
403 *Edwardsiella*, and *Dickeya* were rarely (mean < 0.45 extrachromosomal infections) coinfecting  
404 (Figure 2A). Microbes that were host-associated had the highest mean extrachromosomal  
405 infections ( $1.39 \pm 1.62$ , n=4,282), followed by engineered ( $1.32 \pm 1.44$ , n=281) and  
406 environmental ( $0.95 \pm 0.97$ , n=450) ecosystems (Figure 2B). The model predicts that each  
407 additional prophage sequence yields ~79% the amount of extrachromosomal infections, or a 21%  
408 reduction (Figure 2C).

409 Host energy source (heterotrophic, autotrophic) and ssDNA virus presence were not statistically  
410 significant predictors as judged by AIC model selection. Details of the full, reduced, and  
411 alternative models are provided in the Supplementary Materials and all associated code and data  
412 is deposited in FigShare repository.

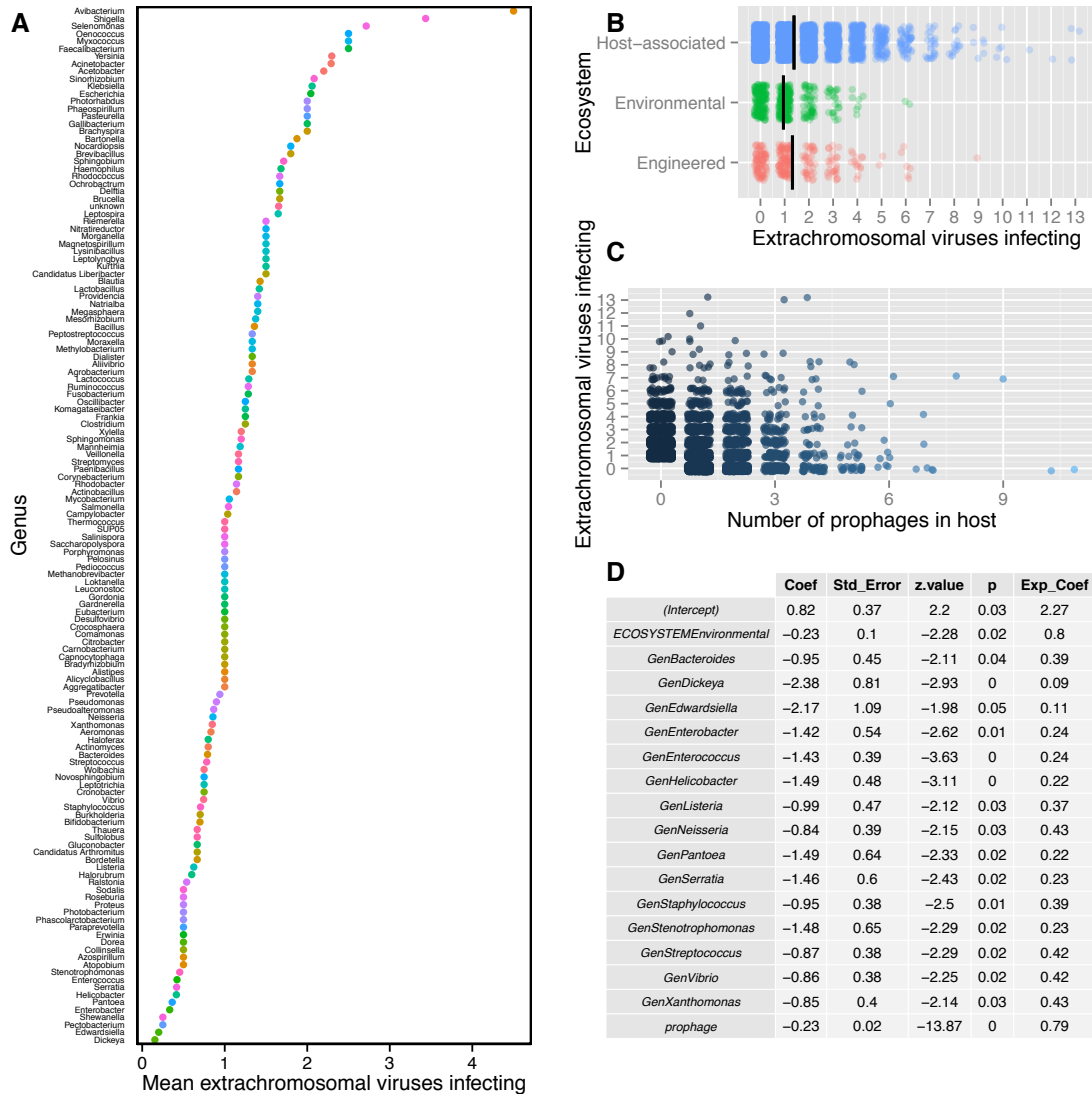

413

414 **Figure 2. Host taxonomy, ecology, and number of prophage sequences predict variation in culture**  
 415 **coinfection.** The data set is composed of viral infections detected using sequence data (n=12,498) in all bacterial and  
 416 archaeal hosts (n=5,492) with sequenced genomes in the National Center for Biotechnology Information's (NCBI)  
 417 databases, supplemented with data on host habitat and energy source collected primarily from the Joint Genome  
 418 Institute's Genomes Online Database (JGI-GOLD). Extrachromosomal viruses represent ongoing acute or persistent  
 419 infections in the microbial culture that was sequenced. Thus, increases in the axes labeled "...extrachromosomal  
 420 viruses infecting" represent increasing viral coinfection in the host culture (not necessarily in single cells within that  
 421 culture). The number of extrachromosomal viruses infecting a host was the response variable in a negative binomial  
 422 regression that tested the effect of five variables (the number of prophage sequences, ssDNA virus presence, host  
 423 taxon, host energy source, and habitat ecosystem) on variation in the response variable. Plots A-C depict all  
 424 variables retained after stepwise model selection using Akaike's Information Criterion (AIC). In Panel A, each point  
 425 represents a microbial genus with its corresponding mean number of extrachromosomal virus infections (only

426 genera with >1 host sampled and nonzero means are included). The colors of each point correspond to each genus.  
427 In Panels B and C, each point represents a unique host with a corresponding number of extrachromosomal virus  
428 infections. Panel B groups hosts according to their habitat ecosystem, as defined by JGI-GOLD database schema;  
429 the point colors correspond to each of these three ecosystem categories. Panel C groups hosts according to the  
430 number of prophage sequences detected in host sequences; the color shades of points become lighter in hosts with  
431 more detected prophages. Panels B and C have data points are offset by a random and small amount (jittered) to  
432 enhance visibility and reduce overplotting. The regression table is presented in Panel D, and only includes variables  
433 with  $p < 0.05$ .

434 ***Single-cell coinfection is influenced by bacterial ecology, virus-virus***  
435 ***interactions, and sequences associated with the CRISPR-Cas defense mechanism***

436 To test the viral and host factors that affected viral coinfection of single cells, I constructed a  
437 Poisson regression on the single-cell coinfection data set, which characterized 143 viral  
438 infections in SUP-05 marine bacteria (sulfur-oxidizing Gammaproteobacteria) isolated as single  
439 cells (n=127) directly from their habitat (Roux *et al.*, 2014). Single cell coinfection was  
440 measured as the number of actively infecting viruses detected by sequence data in each cell.  
441 Stepwise model selection with AIC led to a model that included three factors explaining the  
442 number of actively infecting viruses in single cells: number of prophages, number of CRISPR  
443 spacers, and ocean depth at which cells were collected (Figure 3). The model estimated each  
444 additional prophage would result in ~9% of the amount of active infections (i.e. a 91%  
445 reduction), while each additional CRISPR spacer would result in a ~54% reduction. Depth had a  
446 positive influence on coinfection: every 50 meter increase in depth was predicted to result in  
447 ~80% more active infections.

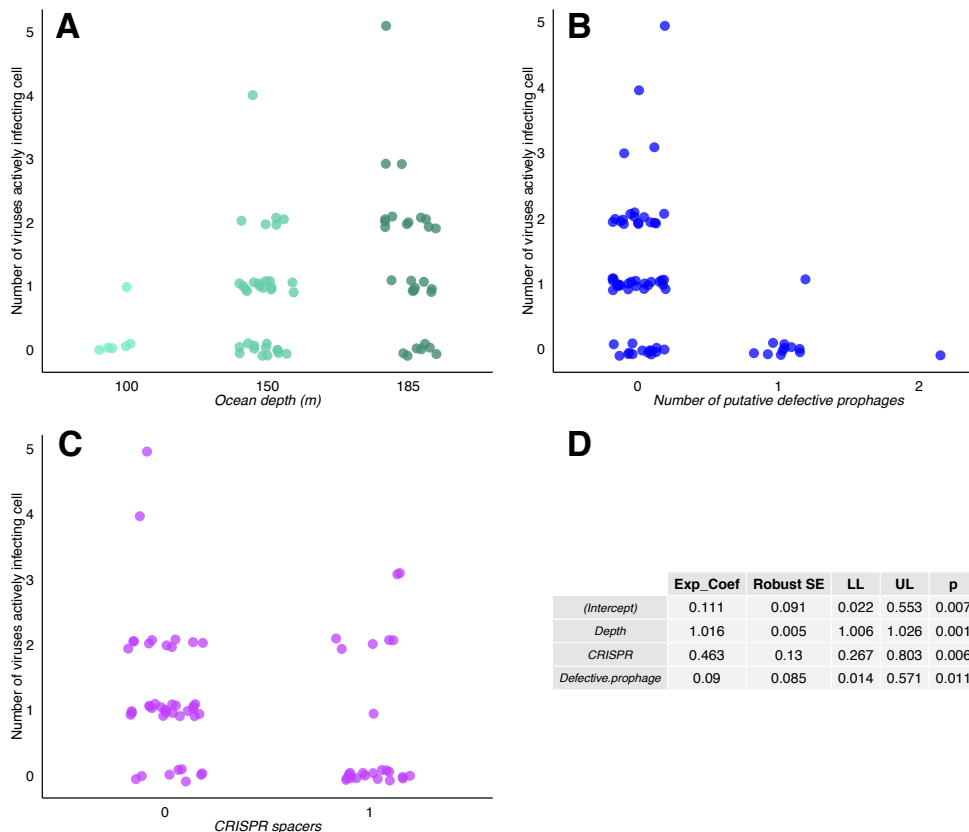

448

449 **Figure 3. Host ecology, number of prophage sequences, and CRISPR spacers predict variation in single-cell**  
 450 **coinfection.** The data set is composed of viral infections (n=143) detected using genome sequence data in a set of  
 451 SUP-05 (sulfur-oxidizing Gammaproteobacteria) marine bacteria isolated as single cells (n=127) from the Saanich  
 452 Inlet in British Columbia, Canada. In Panels A-C each point represents a single-cell amplified genome (SAG). The  
 453 y-axis depicts the number of viruses involved in active infections (active at the time of isolation, e.g. ongoing lytic  
 454 infections) in each cell. Thus, increases in the y-axis represent increasing active viral coinfection of single cells. The  
 455 number of viruses actively infecting each cell was the response variable in a Poisson regression that tested the effect  
 456 of four variables (small subunit rRNA phylogenetic cluster, ocean depth, number of prophage sequences, and  
 457 number of CRISPR spacers) on variation in the response variable. Panels A-C depict all variables retained after  
 458 stepwise model selection using Akaike's Information Criterion (AIC) and group cells according to the ocean depth  
 459 at which the cells were isolated (A), the number of prophage sequences detected (B; conservatively termed putative  
 460 defective prophages here, as in the original published dataset, because sequences were too small to be confidently  
 461 assigned as complete prophages), and the number of CRISPR spacers detected (C); point colors correspond to the  
 462 categories of each variable in each plot. Each point is offset by a random and small amount (jittered) to enhance  
 463 visibility and reduce overplotting. The regression table is presented in panel D.

464 The phylogenetic cluster of the SUP-05 bacterial cells (based on small subunit rRNA amplicon  
 465 sequencing) was not a statistically significant predictor selected using AIC model selection.

466 Details of the full, reduced, and alternative models are  
467 provided in the Supplementary Materials and all  
468 associated code and data is deposited in FigShare  
469 repository.

### 470 *Prophages limit culture and single-cell* 471 *coinfection*

472 Based on the results of the regression analyses  
473 showing that prophage sequences limited coinfection,  
474 and aiming to test the phenomenon of superinfection  
475 exclusion in a large data set, I conducted a more  
476 detailed analysis of the influence of prophages on  
477 coinfection in microbial cultures. I also conducted a  
478 similar analysis using the single cell data set, which is  
479 relatively smaller (n=127 host cells), but provides  
480 better, single-cell level resolution.

481 First, because virus-virus interactions can occur in  
482 cultures of cells, I tested whether prophage-infected  
483 host cultures reduced the probability of other viral  
484 infections in the entire culture coinfection data set. A  
485 majority of prophage-infected host cultures were  
486 coinfections (56.48% of n = 3,134), a modest but  
487 statistically distinguishable increase over a 0.5 null  
488 (Binomial Exact:  $p = 4.344e^{-13}$ , Figure 4A). Of these

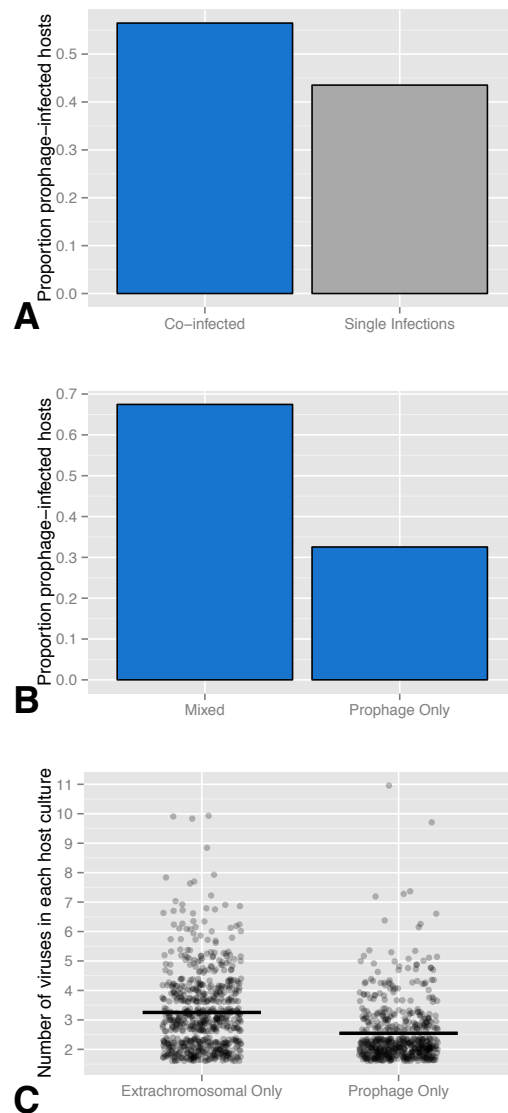

**Figure 4. Host cultures infected with prophages limit coinfection by other prophages, but not extrachromosomal viruses.** The initial data set was composed of viral infections detected using sequence data in sequenced genomes of microbial hosts available in National Center for Biotechnology Information (NCBI) databases. A slight, but statistically significant, majority of host cultures with prophage sequences (n = 3,134) were coinfecting, i.e. had more than one extrachromosomal virus or prophage detected (Panel A, blue bar). Of these, host cultures containing multiple prophages were less frequent than those containing a mix of prophages and extrachromosomal (e.g. acute or persistent) infections (Panel B). On average (black horizontal bars), extrachromosomal-only coinfections involved more viruses than prophage-only coinfections (Panel C) In Panel C each point represents a bacterial or archaeal host and is offset by a random and small amount to enhance visibility.

489 coinfecting host cultures (n=1,770), cultures with more than one prophage sequence (32.54%)  
490 were two times less frequent than those with both prophage sequences and extrachromosomal  
491 viruses (Binomial Exact:  $p < 2.2e^{-16}$ , Figure 4B). Therefore, integrated prophages appear to  
492 reduce the chance of the culture being infected with additional prophage sequences, but not  
493 additional extrachromosomal viruses. Accordingly, host cultures co-infected exclusively by  
494 extrachromosomal viruses (n=675) were infected by  $3.25 \pm 1.34$  viruses, compared to  $2.54 \pm$   
495  $1.02$  prophage sequences (n=575); these quantities showed a statistically significant difference  
496 (Wilcoxon Rank Sum:  $W = 125398.5$ ,  $p < 2.2e^{-16}$ , Figure 4C).

497  
498 Second, to test whether prophage sequences could affect coinfection of single cells in a natural  
499 environment, I examined a single cell amplified genomics data set of SUP05 marine bacteria.  
500 Cells with prophage sequences (conservatively termed putative defective prophages in the  
501 original published dataset, as in Figure 3B, because sequences were too small to be confidently  
502 assigned as complete prophages; S. Roux pers. comm) were less likely to have current infections:  
503 9.09% of cells with prophage sequences had active viral infections, compared to 74.55% of cells  
504 that had no prophage sequences (X-squared = 14.2607, df = 1, p-value = 0.00015). Bacteria with  
505 prophage sequences were undergoing active infection by an average of  $0.09 \pm 0.30$  phages,  
506 whereas bacteria without prophages were infected by  $1.22 \pm 1.05$  phages (Figure 3B). No host  
507 with prophages had current coinfections (i.e.,  $> 1$  active virus infection).

### 508 ***Non-random coinfection of host cultures by ssDNA and dsDNA viruses suggests*** 509 ***mechanisms enhancing coinfection***

510 The presence of ssDNA viruses in host cultures was not a statistically significant predictor of  
511 extrachromosomal infections in the regression analysis of the culture coinfection data set (based  
512 on Roux *et al.*, 2015) that is composed of sequence-based viral detections in all bacterial and



513 archaeal NCBI genome sequences. However, to test the hypothesis that ssDNA-dsDNA viral  
514 infections exhibit non-random coinfection patterns (as found by Roux *et al.*, 2014 for single  
515 SUP05 bacterial cells), I conducted a more focused analysis on the culture coinfection data set.  
516 Coinfected host cultures containing ssDNA viruses (n = 331), were more likely to have dsDNA  
517 or unclassified viruses (70.69%), than multiple ssDNA infections (exact binomial:  $p = 3.314e^{-14}$ ).  
518 These coinfections were >2 times more likely to involve at least one dsDNA virus than none  
519 (exact binomial:  $p = 2.559e^{-11}$ , Figure 5A). To examine whether differential detectability of  
520 ssDNA viruses could affect this result and place it in context of all the infections recorded in the  
521 data set, I conducted further tests. Single-stranded DNA viruses represented 6.82% of the viruses  
522 detected in host cultures in the overall data set (n=12,490). Coinfected host cultures that  
523 contained at least one ssDNA virus represented 6.19% of hosts, in line with, and not statistically  
524 different from the aforementioned overall detectability of ssDNA viruses ( $X^2 = 3.22$ ,  $df = 1$ , p-  
525 value = 0.07254). The most numerous coinfections in the culture coinfection data set were  
526 dsDNA-only coinfections (n=1,898). The proportion of ssDNA-mixed/total-ssDNA coinfections  
527 (0.71) was higher than the proportion of dsDNA-mixed/dsDNA-total (0.19) coinfections (Figure  
528 5B;  $X^2 = 398.55$ ,  $df = 1$ ,  $p < 2.2e^{-16}$ ). Of all the ssDNA viruses detected (n=852) in the data set, a  
529 majority belonged to the *Inoviridae* family (90.96%) with the remainder in the *Microviridae*  
530 (0.70%) or their family was unknown (8.33%). The proportion of hosts infected with *Inoviridae*  
531 was highest in dsDNA-ssDNA coinfections (0.96), higher than hosts with ssDNA-only  
532 coinfections (0.90) or than hosts with ssDNA single infections (0.86); the difference in these



533 three proportions was statistically different from zero ( $X^2 = 10.98$ ,  $df = 2$ ,  $p = 0.00413$ ).

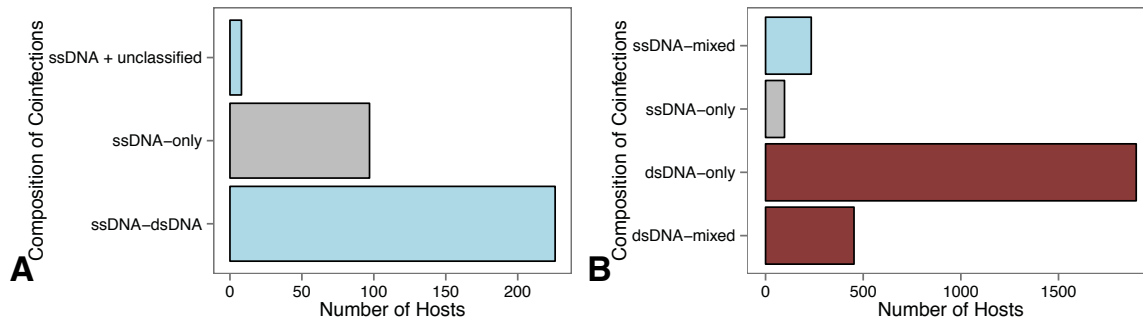

534

535 **Figure 5. Culture coinfections between single-stranded DNA (ssDNA) and double stranded DNA (dsDNA)**  
536 **viruses are more common than expected by chance.** The initial data set was composed of viral infections detected  
537 using sequence data in sequenced genomes of microbial hosts available in National Center for Biotechnology  
538 Information (NCBI) databases. Panel A: Composition of coinfections in all host cultures coinfected with at least one  
539 ssDNA virus ( $n=331$ ) at the time of sequencing. Blue bars are mixed coinfections composed of at least one ssDNA  
540 virus and at least one dsDNA or unclassified virus. The grey bar depicts coinfections exclusively composed of  
541 ssDNA viruses (ssDNA-only). Host culture coinfections involving ssDNA viruses were more likely to occur with  
542 dsDNA or unclassified viruses, than with multiple ssDNA viruses (exact binomial:  $p= 3.314e^{-14}$ ). Panel B: The  
543 majority of host culture coinfections in the data set exclusively involved dsDNA viruses ( $n= 1,898$ ; dsDNA-only red  
544 bar). There were more mixed coinfections involving ssDNA viruses than ssDNA-only coinfections (compare blue  
545 and grey bar), while dsDNA-only coinfections were more prevalent than mixed coinfections involving dsDNA  
546 viruses (compare red bars). Accordingly, the proportion of ssDNA-mixed/total-ssDNA coinfections was higher than  
547 the proportion of dsDNA-mixed/dsDNA-total coinfections (proportion test:  $p < 2.2e^{-16}$ ).

#### 548 **CRISPR spacers limit coinfection at single cell level without spacer matches**

549 The regression analysis of the single-cell data set ( $n=127$  cells of SUP-05 marine bacterial cells)

550 revealed that the presence of CRISPR spacers had a significant overall effect on coinfection of

551 single cells; therefore I examined the effects of CRISPR spacers more closely. Cells with

552 CRISPR spacers were less likely to have active viral infections than those without spacers ( $X$ -

553 squared = 14.03,  $df = 1$ ,  $p$ -value = 0.00018). Cells with CRISPR spacers were less likely to have

554 active viral infections, with 32.00% of cells with CRISPRs having active viral infections,

555 compared to 80.95% percent of bacteria without CRISPR spacers. Bacterial cells with CRISPR

556 spacers had  $0.68 \pm 1.07$  current phage infections compared to  $1.21 \pm 1.00$  for those without

557 spacers (Figure 3C). Bacterial cells with CRISPR spacers could have active infections and

558 coinfections with up to 3 phages. None of the CRISPR spacers matched any of the actively  
559 infecting viruses (Roux *et al.*, 2014), using an exact match search (S. Roux, pers. comm.).

## 560 **Discussion**

### 561 *Summary of findings*

562 The compilation of multiple large-scale data sets of virus-host interactions (>6,000 hosts,  
563 >13,000 viruses) allowed a systematic test of the ecological and biological factors that influence  
564 viral coinfection rates in microbes across a broad range of taxa and environments. I found  
565 evidence for the importance and consistency of host ecology and virus-virus interactions in  
566 shaping potential (cross-infectivity), culture, and single-cell coinfection. In contrast, host  
567 taxonomy was a less consistent predictor of viral coinfection, being a weak predictor of cross-  
568 infectivity and single cell coinfection, but representing the strongest predictor of host culture  
569 coinfections. In the most comprehensive test of the phenomenon of superinfection immunity  
570 conferred by prophages (n = 3,134 hosts), I found that prophage sequences were predictive of  
571 limited coinfection of cultures by other prophages, but less strongly predictive of coinfection by  
572 extrachromosomal viruses. Furthermore, in a smaller sample of single cells of SUP-05 marine  
573 bacteria (n=127 cells), prophage sequences completely excluded coinfection (by prophages or  
574 extrachromosomal viruses). In contrast, I found evidence of *increased* culture coinfection by  
575 ssDNA and dsDNA phages, suggesting mechanisms that may enhance coinfection. At a fine-  
576 scale, single-cell data revealed that CRISPR spacers limit coinfection of single cells in a natural  
577 environment, despite the absence of exact spacer matches in the infecting viruses, suggesting a  
578 potential role for bacterial defense mechanisms. In light of the increasing awareness of the  
579 widespread occurrence of viral coinfection, this study provides the foundation for future work on

580 the frequency, mechanisms, and dynamics of viral coinfection and its ecological and  
581 evolutionary consequences.

### 582 *Host correlates of coinfection*

583 Host ecology stood out as an important predictor of coinfection across all three datasets: cross-  
584 infectivity, culture coinfection, and single cell coinfection. The specific ecological variables  
585 differed in the data sets (bacterial association, isolation habitat, and ocean depth), but ecological  
586 factors were retained as statistically significant predictors in all three models. Moreover, when  
587 ecological variables were standardized between the cross-infectivity and culture coinfection data  
588 sets, the differences in cross-infectivity and coinfection among ecosystem categories were  
589 remarkably similar (Figure S5, Table S2). This result implies that the ecological factors that  
590 predict whether a host *can* be coinfecting are the same that predict whether a host *will* be  
591 coinfecting. These results lend further support to the consistency of host ecology as a predictor of  
592 coinfection. On the other hand, host taxonomy was a less consistent predictor. It was weak or  
593 absent in the cross-infectivity and single-cell coinfection models, respectively, yet it was the  
594 strongest predictor of culture coinfection. This difference could be because the hosts in the cross-  
595 infectivity and single-cell data sets varied predominantly at the strain level (Flores *et al.*, 2011;  
596 Roux *et al.*, 2014), whereas infection patterns are less variable at the Genus level and higher  
597 taxonomic ranks (Flores *et al.*, 2013; Roux *et al.*, 2015) as seen with the culture coinfection  
598 model. Collectively, these findings suggest that the diverse and complex patterns of cross-  
599 infectivity (Holmfeldt *et al.*, 2007) and coinfection observed at the level of bacterial strains may  
600 be best explained by local ecological factors, while at higher taxonomic ranks the phylogenetic  
601 origin of hosts increases in importance (Flores *et al.*, 2011; 2013; Roux *et al.*, 2015). Particular  
602 bacterial lineages can exhibit dramatic differences in cross-infectivity (Koskella and Meaden,

603 2013; Liu *et al.*, 2015) and, as this study shows, coinfection. Thus, further studies with  
604 ecological data and multi-scale phylogenetic information will be necessary to test the relative  
605 influence of bacterial phylogeny on coinfection.  
606  
607 Sequences associated with the CRISPR-Cas bacterial defense mechanism were another important  
608 factor influencing coinfection patterns, but were only tested in the comparatively smaller single-  
609 cell data set (n=127 cells of SUP05 marine bacteria). The presence of CRISPR spacers reduced  
610 the extent of active viral infections, even though these spacers had no exact matches (S. Roux,  
611 pers. comm.) to any of the infecting viruses identified (Roux *et al.*, 2014). These results provide  
612 some of the first evidence from a natural environment that CRISPR's protective effects could  
613 extend beyond viruses with exact matches to the particular spacers within the cell (Fineran *et al.*,  
614 2014; Semenova *et al.*, 2011). Although very specific sequence matching is thought to be  
615 required for CRISPR-Cas-based immunity (Barrangou *et al.*, 2007; Brouns *et al.*, 2008; Mojica  
616 *et al.*, 2005), the system can tolerate mismatches in protospacers (within and outside of the seed  
617 region: Semenova *et al.*, 2011; Fineran *et al.*, 2014), enabling protection (interference) against  
618 related phages by a mechanism of enhanced spacer acquisition termed priming (Fineran *et al.*,  
619 2014). The seemingly broader protective effect of CRISPR-Cas beyond specific sequences may  
620 help explain continuing effectiveness of CRISPR-Cas (Fineran *et al.*, 2014) in the face of rapid  
621 viral coevolution for escape (Heidelberg *et al.*, 2009; Tyson and Banfield, 2008; Andersson and  
622 Banfield, 2008). However, caution is warranted as CRISPR spacers sequences alone cannot  
623 indicate whether CRISPR-Cas is active. Some bacterial taxa have inactive CRISPR-Cas systems,  
624 notably *Escherichia coli* K-12 (Westra *et al.*, 2010), and phages also possess anti-CRISPR  
625 mechanisms (Bondy-Denomy *et al.*, 2015; Seed *et al.*, 2013) that can counter bacterial defenses.

626 In this case the unculturability of SUP05 bacteria preclude laboratory confirmation of CRISP-  
627 Cas activity, but given the strong statistical association of CRISPR space sequences with a  
628 reduction in active viral infections (after controlling for other factors), it is most parsimonious to  
629 tentatively conclude that the CRISPR-Cas mechanism is the likeliest culprit behind these  
630 reductions. To elucidate and confirm the roles of bacterial defense systems in shaping  
631 coinfection, more data on CRISPR-Cas and other viral infection defense mechanisms will be  
632 required across different taxa and environments.

633  
634 This study revealed the strong predictive power of several host factors in explaining viral  
635 coinfection, yet there was still substantial unexplained variation in the regression models (see  
636 Results). Thus, the host factors tested herein should be regarded as starting points for future  
637 experimental examinations. For instance, host energy source was not a statistically significant  
638 predictor in the cross-infectivity and culture coinfection models, perhaps due to the much smaller  
639 sample sizes of autotrophic hosts. However, both data sets yield similar summary statistics, with  
640 heterotrophic hosts having 59% higher cross-infectivity and 77% higher culture coinfection  
641 (Figure S6). Moreover, other factors not examined, such as geography could plausibly affect  
642 coinfection. The geographic origin of strains can affect infection specificity such that bacteria  
643 isolated from one location are likely to be infected by more phage isolated from the same  
644 location, as observed with marine microbes (Flores *et al.*, 2013). This pattern could be due to the  
645 influence of local adaptation of phages to their hosts (Koskella *et al.*, 2011) and represents an  
646 interesting avenue for further research.

647 ***The role of virus-virus interactions in coinfection***

648 The results of this study suggest that virus-virus interactions play a role in limiting *and*  
649 enhancing coinfection. First, host cultures and single cells with prophage sequences showed  
650 limited coinfection. In what is effectively the largest test of viral superinfection exclusion (n =  
651 3,134 hosts), host cultures with prophage sequences exhibited limited by other prophages, but  
652 not as much by extrachromosomal viruses. Although this focused analysis showed that prophage  
653 sequences limited extrachromosomal infection less strongly than additional prophage infections,  
654 the regression analysis suggested that they did have an effect: a statistically significant ~21%  
655 reduction in extrachromosomal infections for each additional prophage detected. As these were  
656 culture coinfections and not necessarily single-cell coinfections, these results are consistent with  
657 a single-cell study of *Salmonella* cultures showing that lysogens can activate cell subpopulations  
658 to be transiently immune from viral infection (Cenens *et al.*, 2015). Prophage sequences had a  
659 more dramatic impact at the single-cell level in SUP05 marine bacteria in a natural environment,  
660 severely limiting active viral infection and completely excluding coinfection. The results on  
661 culture-level and single-cell coinfection come from very different data sets, which should be  
662 examined carefully before drawing general patterns: The culture coinfection data set is composed  
663 of an analysis of all publicly available bacterial and archaeal genome sequences in NCBI  
664 databases that show evidence of a viral infection. These sequences show a bias towards  
665 particular taxonomic groups (e.g. *Proteobacteria*, model study species) and those that are easy to  
666 grow in pure culture. The single cell data set is limited to 127 cells of just one host type (SUP05  
667 marine bacteria) isolated in a particular environment, as opposed to the 5,492 hosts in the culture  
668 coinfection data set. This limitation prohibits taxonomic generalizations about the effects on  
669 prophage sequences on single cells, but extends laboratory findings to a natural environment.  
670 Additionally, both of these data sets use sequences to detect the presence of prophages, which

671 means the activity of these prophage sequences cannot be confirmed, as with any study using  
672 sequence data alone. Along these lines, in the original single cell coinfection data set (Roux *et*  
673 *al.*, 2014), the prophage sequences were conservatively termed ‘putative defective prophages’ (as  
674 in Figure 3 here), because sequences were too small to be confidently assigned as complete  
675 prophage sequences (S. Roux, pers. comm.). If prophages in either data set are not active, this  
676 could mean that bacterial domestication of phage functions (Bobay *et al.*, 2014; Asadulghani *et*  
677 *al.*, 2009), rather than phage-phage interactions in a strict sense, would explain protection from  
678 infection conferred by these prophage sequences in host cultures and single cells. In view of  
679 these current limitations, a wider taxonomic and ecological range of culture and single-cell  
680 sequence data, together with laboratory studies when possible, should confirm and elucidate the  
681 role of prophage sequences in affecting coinfection dynamics. Interactions in coinfection  
682 between temperate bacteriophages can affect viral fitness (Dulbecco, 1952; Refardt, 2011),  
683 suggesting latent infections are a profitable avenue for future research on virus-virus interactions.

684  
685 Second, another virus-virus interaction examined in this study appeared to increase the chance of  
686 coinfection. While prophage sequences strongly limited coinfection in single cells, Roux *et al.*’s  
687 (2014) original analysis of this same data set found strong evidence of enhanced coinfection (i.e.  
688 higher than expected by random chance) between dsDNA and ssDNA *Microviridae* phages in  
689 bacteria from the SUP05\_03 cluster. I conducted a larger test of this hypothesis using a different,  
690 diverse set of 331 bacterial and archaeal hosts infected by ssDNA viruses included in the culture  
691 coinfection data set (Roux *et al.*, 2015). This analysis provides evidence that ssDNA-dsDNA  
692 culture coinfections occur more frequently than would be expected by chance, extending the  
693 taxonomic applicability of this result from one SUP05 bacterial lineage to hundreds of taxa.

694 Thus, enhanced coinfection, perhaps due to the long, persistent infection cycles of some ssDNA  
695 viruses, particularly the *Inoviridae* (e.g. *Innoviridae*: Rakonjac *et al.*, 2011), might be a major  
696 factor explaining findings of phages with chimeric genomes composed of different types of  
697 nucleic acids (Roux *et al.*, 2013; Diemer and Stedman, 2012). Filamentous or rod-shaped ssDNA  
698 phages (family *Inoviridae*; Székely and Breitbart, 2016) often conduct multiple replications  
699 without killing their bacterial hosts (Rakonjac *et al.*, 2011; Székely and Breitbart, 2016; Mai-  
700 Prochnow *et al.*, 2015), allowing more time for other viruses to coinfect the cell and providing a  
701 potential mechanistic basis for the enhanced dsDNA-ssDNA coinfections. In line with this  
702 prediction, over 96% of dsDNA-ssDNA host culture coinfections contained at least one virus  
703 from the *Inoviridae*, a greater (and statistically distinguishable) percentage than contained in  
704 ssDNA-only coinfections or ssDNA single infections. Notwithstanding, caution is warranted due  
705 to known biases against the detectability of ssDNA compared to dsDNA viruses in high-  
706 throughput sequencing library preparation (Roux *et al.*, 2016). In this study, this concern can be  
707 addressed by noting that: not all the sequencing data in the culture coinfection data set was  
708 generated by high-throughput sequencing, the prevalence of host coinfections containing ssDNA  
709 viruses was virtually identical (within 0.63%) to the detectability of ssDNA viruses in the overall  
710 data set, and the prevalence of ssDNA viruses in this data set (~6%) is in line with validated,  
711 unbiased estimates of ssDNA virus prevalence from natural (marine) habitats (Roux *et al.*, 2016).  
712 However, given that the ssDNA virus sample is comparatively smaller than the dsDNA sample,  
713 future studies should focus on examining ssDNA-dsDNA coinfection prevalence and  
714 mechanisms.

715



716 Collectively, these results highlight the importance of virus-virus interactions as part of the suite  
717 of evolved viral strategies to mediate frequent interactions with other viruses, from limiting to  
718 promoting coinfection, depending on the evolutionary and ecological context (Turner and Duffy,  
719 2009).

### 720 *Implications and applications*

721 In sum, the results of this study suggest microbial host ecology and virus-virus interactions are  
722 important drivers of the widespread phenomenon of viral coinfection. An important implication  
723 is that virus-virus interactions will constitute an important selective pressure on viral evolution.  
724 The importance of virus-virus interactions may have been underappreciated because of an  
725 overestimation of the importance of superinfection exclusion (Dulbecco, 1952). Paradoxically,  
726 superinfection avoidance may actually highlight the selective force of virus-virus interactions. In  
727 an evolutionary sense, this viral trait exists precisely because the potential for coinfection is high.  
728 If this is correct, variability in potential and realized coinfection, as found in this study, suggests  
729 that the manifestation of superinfection exclusion will vary across viral groups according to their  
730 ecological context. Accordingly, there are specific viral mechanisms that promote coinfection, as  
731 found in this study with ssDNA/dsDNA coinfections and in other studies (Dang *et al.*, 2004;  
732 Cicin-Sain *et al.*, 2005; Turner *et al.*, 1999; Altan-Bonnet and Chen, 2015; Erez *et al.*, 2017;  
733 Aguilera *et al.*, 2017). I found substantial variation in cross-infectivity, culture coinfection, and  
734 single-cell coinfection and, in the analyses herein, ecology was always a statistically significant  
735 and strong predictor of coinfection, suggesting that the selective pressure for coinfection is going  
736 to vary across local ecologies. This is in agreement with observations of variation in viral genetic  
737 exchange (which requires coinfection) rates across different geographic localities in a variety of  
738 viruses (Díaz-Muñoz *et al.*, 2013; Trifonov *et al.*, 2009; Held and Whitaker, 2009).

739

740 These results have clear implications, not only for the study of viral ecology in general, but for  
741 practical biomedical and agricultural applications of phages and bacteria/archaea. Phage therapy  
742 is often predicated on the high host specificity of phages, but intentional coinfection could be an  
743 important part of the arsenal as part of combined or cocktail phage therapy. This study also  
744 suggests that viral coinfection in the microbiome should be examined, as part of the influence of  
745 the virome on the larger microbiome (Pride *et al.*, 2012; Minot *et al.*, 2011; Reyes *et al.*, 2010).  
746 Finally, if these results apply in eukaryotic viruses and their hosts, variation in viral coinfection  
747 rates should be considered in the context of treating and preventing infections, as coinfection  
748 likely represents the default condition of human hosts (Wylie *et al.*, 2014). Coinfection and  
749 virus-virus interactions have been implicated in changing disease outcomes for hosts (Vignuzzi  
750 *et al.*, 2006), altering epidemiology of viral diseases (Nelson *et al.*, 2008), and impacting  
751 antimicrobial therapies (Birger *et al.*, 2015). In sum, the results of this study suggest that the  
752 ecological context, mechanisms, and evolutionary consequences of virus-virus interactions  
753 should be considered as an important subfield in the study of viruses.

## 754 **Acknowledgements**

755 Simon Roux kindly provided extensive assistance with previously published data sets. T.B.K.

756 Reddy kindly provided database records from Joint Genome Institute's Genomes Online

757 Database. I am indebted to Joshua Weitz, Britt Koskella, and Jay Lennon for providing helpful

758 critiques and advice on an earlier version of this manuscript. A Faculty Fellowship to SLDM

759 from New York University supported this work.

760 **Data availability**

761 A list and description of data sources are included in Supplementary Table 1, and the raw data  
762 and code used in this paper are deposited in the FigShare data repository (FigShare  
763 doi:[10.6084/m9.figshare.2072929](https://doi.org/10.6084/m9.figshare.2072929)).

764 **References**

- 765  
766 Abrahams MR, Anderson JA, Giorgi EE, Seoighe C, Mlisana K, Ping LH, *et al.* (2009).  
767 Quantitating the Multiplicity of Infection with Human Immunodeficiency Virus Type 1 Subtype  
768 C Reveals a Non-Poisson Distribution of Transmitted Variants. *J Virol* **83**: 3556–3567.
- 769 Aguilera ER, Erickson AK, Jesudhasan PR, Robinson CM, Pfeiffer JK. (2017). Plaques formed  
770 by mutagenized viral populations have elevated co-infection frequencies. *bioRxiv* doi:  
771 10.1101/108092 [PREPRINT]
- 772 Akaike H. (1974). A new look at the statistical model identification. *IEEE transactions on*  
773 *automatic control* **19** (6): 716-723.
- 774 Altan-Bonnet N, Chen Y-H. (2015). Intercellular transmission of viral populations with vesicles.  
775 *J Virol* **89**: 12242–12244.
- 776 Andersson AF, Banfield JF. (2008). Virus population dynamics and acquired virus resistance in  
777 natural microbial communities. *Science* **320**: 1047–1050.
- 778 Asadulghani M, Ogura Y, Ooka T, Itoh T, Sawaguchi A, Iguchi A, *et al.* (2009). The defective  
779 prophage pool of *Escherichia coli* O157: prophage-prophage interactions potentiate horizontal  
780 transfer of virulence determinants. *Plos Pathog* **5**: e1000408.
- 781 Barrangou R, Fremaux C, Deveau H, Richards M, Boyaval P, Moineau S, *et al.* (2007). CRISPR  
782 provides acquired resistance against viruses in prokaryotes. *Science* **315**: 1709–1712.
- 783 Bergh Ø, Børsheim KY, Bratbak G, Heldal M. (1989). High abundance of viruses found in  
784 aquatic environments. *Nature* **340**: 467–468.
- 785 Berngruber TW, Weissing FJ, Gandon S. (2010). Inhibition of superinfection and the evolution  
786 of viral latency. *J Virol* **84**: 10200–10208.
- 787 Bertani G. (1953). Lysogenic versus lytic cycle of phage multiplication. *Cold Spring Harbor*  
788 *Symposia on Quantitative Biology* **18**: 65–70.
- 789 Bertani G. (1954). Studies on lysogenesis. III. Superinfection of lysogenic *Shigella dysenteriae*  
790 with temperate mutants of the carried phage. *J Bacteriol* **67**: 696–707.
- 791 Birger RB, Kouyos RD, Cohen T, Griffiths EC, Huijben S, Mina M, *et al.* (2015). The potential

- 792 impact of coinfection on antimicrobial chemotherapy and drug resistance. *Trends Microbiol* **23**:  
793 537–544.
- 794 Bobay L-M, Touchon M, Rocha EPC. (2014). Pervasive domestication of defective prophages  
795 by bacteria. *P Natl Acad Sci-Biol* **111**: 12127–12132.
- 796 Bondy-Denomy J, Garcia B, Strum S, Du M, Rollins MF, Hidalgo-Reyes Y, *et al.* (2015).  
797 Multiple mechanisms for CRISPR–Cas inhibition by anti-CRISPR proteins. *Nature* **526**: 136–  
798 139.
- 799 Brouns SJJ, Jore MM, Lundgren M, Westra ER, Slijkhuis RJH, Snijders APL, *et al.* (2008).  
800 Small CRISPR RNAs guide antiviral defense in prokaryotes. *Science* **321**: 960–964.
- 801 Cenens W, Makumi A, Govers SK, Lavigne R, Aertsen A. (2015). Viral Transmission Dynamics  
802 at Single-Cell Resolution Reveal Transiently Immune Subpopulations Caused by a Carrier State  
803 Association. *PLoS Genet* **11**: e1005770.
- 804 Cicin-Sain L, Podlech J, Messerle M, Reddehase MJ, Koszinowski UH. (2005). Frequent  
805 Coinfection of Cells Explains Functional In Vivo Complementation between Cytomegalovirus  
806 Variants in the Multiply Infected Host. *J Virol* **79**: 9492–9502.
- 807 Dang Q, Chen JB, Unutmaz D, Coffin JM, Pathak VK, Powell D, *et al.* (2004). Nonrandom  
808 HIV-1 infection and double infection via direct and cell-mediated pathways. *Proc Natl Acad Sci*  
809 *U S A* **101**: 632–637.
- 810 DaPalma T, Doonan BP, Trager NM, Kasman LM. (2010). A systematic approach to virus-virus  
811 interactions. *Virus Research* **149**: 1–9.
- 812 Delbruck M. (1946). Bacterial viruses or bacteriophages. *Biological Reviews* **21**: 30–40.
- 813 Diemer GS, Stedman KM. (2012). A novel virus genome discovered in an extreme environment  
814 suggests recombination between unrelated groups of RNA and DNA viruses. *Biology Direct* **7**:  
815 13.
- 816 Díaz-Muñoz SL, Koskella B. (2014). Bacteria–Phage Interactions in Natural Environments.  
817 *Advances in Applied Microbiology* **89**: 135–183.
- 818 Díaz-Muñoz SL, Tenaillon O, Goldhill D, Brao K, Turner PE, Chao L. (2013). Electrophoretic  
819 mobility confirms reassortment bias among geographic isolates of segmented RNA phages. *BMC*  
820 *Evol Biol* **13**: 206.
- 821 Dropulić B, Hěrmánková M, Pitha PM. (1996). A conditionally replicating HIV-1 vector  
822 interferes with wild-type HIV-1 replication and spread. *Proc Natl Acad Sci U S A* **93**: 11103–  
823 11108.
- 824 Dulbecco R. (1952). Mutual exclusion between related phages. *J Bacteriol* **63**: 209–217.
- 825 Ellis EL, Delbruck M. (1939). The growth of bacteriophage. *J Gen Physiol* **22**: 365–384.

- 826 Erez Z, Steinberger-Levy I, Shamir M, Doron S, Stokar-Avihail A, Peleg Y, *et al.* (2017).  
827 Communication between viruses guides lysis-lysogeny decisions. *Nature* **541**: 488–493.
- 828 Fineran PC, Gerritzen MJH, Suárez-Diez M, Künne T, Boekhorst J, van Hijum SAFT, *et al.*  
829 (2014). Degenerate target sites mediate rapid primed CRISPR adaptation. *P Natl Acad Sci-Biol*  
830 **111**: E1629–38.
- 831 Flores CO, Meyer JR, Valverde S, Farr L, Weitz JS. (2011). Statistical structure of host–phage  
832 interactions. *Proc Natl Acad Sci U S A* **108**: E288–E297.
- 833 Flores CO, Valverde S, Weitz JS. (2013). Multi-scale structure and geographic drivers of cross-  
834 infection within marine bacteria and phages. *The ISME Journal* **7**: 520–532.
- 835 Ghedin E, Sengamalay NA, Shumway M, Zaborsky J, Feldblyum T, Subbu V, *et al.* (2005).  
836 Large-scale sequencing of human influenza reveals the dynamic nature of viral genome  
837 evolution. *Nature* **437**: 1162–1166.
- 838 Heidelberg JF, Nelson WC, Schoenfeld T, Bhaya D. (2009). Germ warfare in a microbial mat  
839 community: CRISPRs provide insights into the co-evolution of host and viral genomes. *Plos One*  
840 **4**: e4169.
- 841 Held NL, Whitaker RJ. (2009). Viral biogeography revealed by signatures in *Sulfolobus*  
842 *islandicus* genomes. *Environmental Microbiology* **11**: 457–466.
- 843 Holmfeldt K, Middelboe M, Nybroe O, Riemann L. (2007). Large variabilities in host strain  
844 susceptibility and phage host range govern interactions between lytic marine phages and their  
845 *Flavobacterium* hosts. *Applied and Environmental Microbiology* **73**: 6730–6739.
- 846 Horvath P, Barrangou R. (2010). CRISPR/Cas, the immune system of bacteria and archaea.  
847 *Science* **327**: 167–170.
- 848 Joseph SB, Hanley KA, Chao L, Burch CL. (2009). Coinfection rates in phi 6 bacteriophage are  
849 enhanced by virus-induced changes in host cells. *Evol Appl* **2**: 24–31.
- 850 Kaiser D, Dworkin M. (1975). Gene transfer to myxobacterium by *Escherichia coli* phage P1.  
851 *Science* **187**: 653–654.
- 852 Koskella B, Meaden S. (2013). Understanding bacteriophage specificity in natural microbial  
853 communities. *Viruses* **5**: 806–823.
- 854 Koskella B, Thompson JN, Preston GM, Buckling A. (2011). Local biotic environment shapes  
855 the spatial scale of bacteriophage adaptation to bacteria. *The American Naturalist* **177**: 440–451.
- 856 Labonté JM, Swan BK, Poulos B, Luo H, Koren S, Hallam SJ, *et al.* (2015). Single-cell  
857 genomics-based analysis of virus-host interactions in marine surface bacterioplankton. *The ISME*  
858 *Journal* **9**: 2386–2399.
- 859 Labrie SJ, Samson JE, Moineau S. (2010). Bacteriophage resistance mechanisms. *Nature* **8**: 317–

- 860 327.
- 861 Li C, Hatta M, Nidom CA, Muramoto Y, Watanabe S, Neumann G, *et al.* (2010). Reassortment  
862 between avian H5N1 and human H3N2 influenza viruses creates hybrid viruses with substantial  
863 virulence. *P Natl Acad Sci-Biol* **107**: 4687–4692.
- 864 Linn S, Arber W. (1968). Host specificity of DNA produced by *Escherichia coli*, X. In vitro  
865 restriction of phage fd replicative form. *Proc Natl Acad Sci U S A* **59**: 1300–1306.
- 866 Liu J, Yan R, Zhong Q, Ngo S, Bangayan NJ, Nguyen L, *et al.* (2015). The diversity and host  
867 interactions of *Propionibacterium acnes* bacteriophages on human skin. *The ISME Journal* **9**:  
868 2078–2093.
- 869 Mai-Prochnow A, Hui JGK, Kjelleberg S, Rakonjac J, McDougald D, Rice SA. (2015). 'Big  
870 things in small packages: the genetics of filamentous phage and effects on fitness of their host'.  
871 *FEMS Microbiol Rev* **39**: 465–487.
- 872 Minot S, Sinha R, Chen J, Li H, Keilbaugh SA, Wu GD, *et al.* (2011). The human gut virome:  
873 Inter-individual variation and dynamic response to diet. *Genome Research* **21**: 1616–1625.
- 874 Moebus K, Nattkemper H. (1981). Bacteriophage sensitivity patterns among bacteria isolated  
875 from marine waters. *Helgolander Meeresuntersuchungen* **34**: 375–385.
- 876 Mojica FJM, Díez-Villaseñor C, García-Martínez J, Soria E. (2005). Intervening sequences of  
877 regularly spaced prokaryotic repeats derive from foreign genetic elements. *J Mol Evol* **60**: 174–  
878 182.
- 879 Mukherjee S, Stamatis D, Bertsch J, Ovchinnikova G, Verezemskaja O, Isbandi M, *et al.* (2017).  
880 Genomes OnLine Database (GOLD) v.6: data updates and feature enhancements. *Nucleic Acids*  
881 *Research* **45**: D446–D456.
- 882 Murray NE. (2002). 2001 Fred Griffith review lecture. Immigration control of DNA in bacteria:  
883 self versus non-self. *Microbiology (Reading, Engl)* **148**: 3–20.
- 884 Nelson MI, Viboud C, Simonsen L, Bennett RT, Gieseher SB, St George K, *et al.* (2008).  
885 Multiple reassortment events in the evolutionary history of H1N1 influenza A virus since 1918.  
886 *Plos Pathog* **4**: e1000012.
- 887 Pride DT, Salzman J, Haynes M, Rohwer F, Davis-Long C, White RA, *et al.* (2012). Evidence of  
888 a robust resident bacteriophage population revealed through analysis of the human salivary  
889 virome. *The ISME Journal* **6**: 915–926.
- 890 R Development Core Team. (2011). R: A Language and Environment for Statistical Computing.
- 891 Rakonjac J, Bennett NJ, Spagnuolo J, Gagic D, Russel M. (2011). Filamentous bacteriophage:  
892 biology, phage display and nanotechnology applications. *Curr Issues Mol Biol* **13**: 51–76.
- 893 Refardt D. (2011). Within-host competition determines reproductive success of temperate



- 894 bacteriophages. *The ISME Journal* **5**: 1451–1460.
- 895 Reyes A, Haynes M, Hanson N, Angly FE, Heath AC, Rohwer F, *et al.* (2010). Viruses in the  
896 faecal microbiota of monozygotic twins and their mothers. *Nature* **466**: 334–338.
- 897 Rohwer F, Barott K. (2012). Viral information. *Biol Philos* **28**: 283–297.
- 898 Roux S, Enault F, Bronner G, Vaultot D, Forterre P, Krupovic M. (2013). Chimeric viruses blur  
899 the borders between the major groups of eukaryotic single-stranded DNA viruses. *Nature*  
900 *Communications* **4**: 2700.
- 901 Roux S, Hallam SJ, Woyke T, Sullivan MB. (2015). Viral dark matter and virus-host interactions  
902 resolved from publicly available microbial genomes. *eLife* **4**: e08490.
- 903 Roux S, Hawley AK, Torres Beltran M, Scofield M, Schwientek P, Stepanauskas R, *et al.*  
904 (2014). Ecology and evolution of viruses infecting uncultivated SUP05 bacteria as revealed by  
905 single-cell- and meta-genomics. *eLife* **3**: e03125.
- 906 Roux S, Krupovic M, Poulet A, Debros D, Enault F. (2012). Evolution and diversity of the  
907 Microviridae viral family through a collection of 81 new complete genomes assembled from  
908 virome reads. *Plos One* **7**: e40418.
- 909 Roux S, Solonenko NE, Dang VT, Poulos BT, Schwenck SM, Goldsmith DB, *et al.* (2016).  
910 Towards quantitative viromics for both double-stranded and single-stranded DNA viruses. *PeerJ*  
911 **4**: e2777.
- 912 Seed KD, Lazinski DW, Calderwood SB, Camilli A. (2013). A bacteriophage encodes its own  
913 CRISPR/Cas adaptive response to evade host innate immunity. *Nature* **494**: 489–491.
- 914 Semenova E, Jore MM, Datsenko KA, Semenova A, Westra ER, Wanner B, *et al.* (2011).  
915 Interference by clustered regularly interspaced short palindromic repeat (CRISPR) RNA is  
916 governed by a seed sequence. *P Natl Acad Sci-Biol* **108**: 10098–10103.
- 917 Spencer R. (1957). A possible example of geographical variation in bacteriophage sensitivity.  
918 *Journal of General Microbiology* **17**: xi–xii.
- 919 Suttle CA. (2007). Marine viruses--major players in the global ecosystem. *Nature Reviews*  
920 *Microbiology* **5**: 801–812.
- 921 Székely AJ, Breitbart M. (2016). Single-stranded DNA phages: from early molecular biology  
922 tools to recent revolutions in environmental microbiology. *FEMS Microbiology Letters* **363** doi:  
923 10.1093/femsle/fnw027.
- 924 Trifonov V, Khiabani H, Rabadan R. (2009). Geographic dependence, surveillance, and  
925 origins of the 2009 influenza A (H1N1) virus. *N Engl J Med* **361**: 115–119.
- 926 Turner P, Burch C, Hanley K, Chao L. (1999). Hybrid frequencies confirm limit to coinfection in  
927 the RNA bacteriophage phi 6. *J Virol* **73**: 2420–2424.

- 928 Turner P, Chao L. (1998). Sex and the evolution of intrahost competition in RNA virus phi 6.  
929 *Genetics* **150**: 523–532.
- 930 Turner PE, Duffy S. (2009). Evolutionary ecology of multiple phage adsorption and infection.  
931 In: Abedon ST (ed). *Bacteriophage Ecology: Population Growth, Evolution, and Impact of*  
932 *Bacterial Viruses*. Cambridge University Press.
- 933 Tyson GW, Banfield JF. (2008). Rapidly evolving CRISPRs implicated in acquired resistance of  
934 microorganisms to viruses. *Environmental Microbiology* **10**: 200–207.
- 935 Vignuzzi M, Stone JK, Arnold JJ, Cameron CE, Andino R. (2006). Quasispecies diversity  
936 determines pathogenesis through cooperative interactions in a viral population. *Nature* **439**: 344–  
937 348.
- 938 Warton DI, Hui FKC. (2011). The arcsine is asinine: the analysis of proportions in ecology.  
939 *Ecology* **92**: 3–10.
- 940 Weinbauer MG. (2004). Ecology of prokaryotic viruses. *FEMS Microbiol Rev* **28**: 127–181.
- 941 Westra ER, Pul Ü, Heidrich N, Jore MM, Lundgren M, Stratmann T, *et al.* (2010). H-NS-  
942 mediated repression of CRISPR-based immunity in Escherichia coli K12 can be relieved by the  
943 transcription activator LeuO. *Mol Microbiol* **77**: 1380–1393.
- 944 Wickham H. (2009). *ggplot2: Elegant Graphics for Data Analysis*. Springer-Verlag: New York.
- 945 Wigington CH, Sonderegger D, Brussaard CPD, Buchan A, Finke JF, Fuhrman JA, *et al.* (2016).  
946 Re-examination of the relationship between marine virus and microbial cell abundances. *Nat*  
947 *Microbiol* **1**: 15024.
- 948 Worobey M, Holmes EC. (1999). Evolutionary aspects of recombination in RNA viruses. *J Gen*  
949 *Viro* **80 (Pt 10)**: 2535–2543.
- 950 Wylie KM, Mihindukulasuriya KA, Zhou Y, Sodergren E, Storch GA, Weinstock GM. (2014).  
951 Metagenomic analysis of double-stranded DNA viruses in healthy adults. *BMC Biol* **12**: 71.
- 952
- 953
